# Supplementary material for: Identification and characterization of multiple rubisco activases in chemoautotrophic bacteria
Source: PubMed Central journal article supplement (PMC4660213; doi:10.1038/ncomms9883), 2015-11-16
Supplement: ncomms9883-s1.pdf [file ncomms9883-s1.pdf]

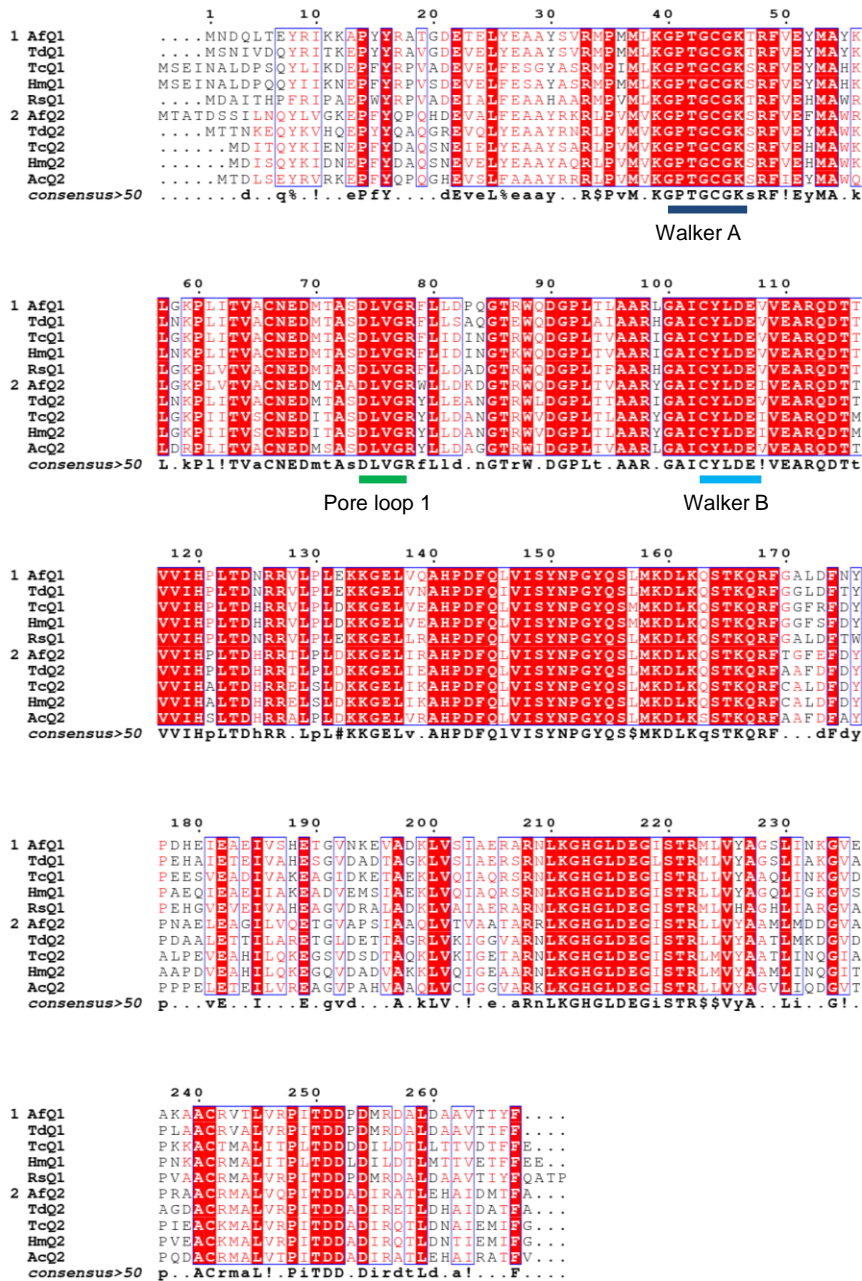

**Supplementary Figure 1| Sequence alignment of representative CbbQ sequences.** Amino acid sequences of CbbQ1 and CbbQ2 proteins from selected chemoautotrophic bacteria were aligned using Clustal Omega. Red lettering indicates similar residues, whereas identical residues are shown in white on red background. Regions of homology are framed in blue. AAA+ family motifs probed experimentally in this study are indicated below the sequences by coloured bars. Uniprot accession codes of the sequences are: *Acidithiobacillus ferrooxidans*, AfQ1 (B7JA26), AfQ2 (B7J5E4); *Thiobacillus denitrificans*, TdQ1 (Q3SFN1), TdQ2 (Q3SFL6); *Thiomicrospira crunogena* XCL-2, TcQ1 (Q31IJ8), TcQ2 (Q31IK4); *Hydrogenovibrio marinus*, HmQ1 (Q75W43), HmQ2 (Q9WXI1); *Rhodobacter sphaeroides* ATCC17025, RsQ1 (A4WZV3); *Acidithiobacillus caldus*, AcQ2 (F9ZR06). The figure was prepared using Esript<sup>1</sup>.

```

1 AfO1      578 VRDLGVLVLDIESTIND...KVRGSED SILQLTRDAISLLADAMNRTGDPFAHGFHS
Tdo1      591 TRDFSILVLDIESTINE...TVQDQEY SVLDLTRQACVLLADAINKVGDPFAHGFSSD
Tco1      583 SREVSVVVLDIESTNE...MVDGGDKTVLEVTQBAAILVSHAINGIGDKFAHGFSSD
HmO1      502 TRDVAVMLLDIESTIND...MVPGSEKTIIEVTQBAAILVSHAINGIGDQFAHGFSSD
RsO1      550 TRDVAVMLLDIESTIND...PLAAGGRLIDVTRBATVLLAEAVHRVGDQFAHGFSSD
2 AfO2      563 GRDIAVTLLDIESTSLNE SVKTTGGGGDQTVLQLSQBAVSLLAWSIEQIGDPFAHGFNSN
Tdo2      576 GRDIAVMLLDIESTSLNE...KAAGAGQTIELLSQBAVSLLAWSIEKIGDPFAHGFNSN
Tco2      564 SRNIAVMLLDIESTSLKE...RNQETGQTLLELSEBALAITAWTIEQIGDKFAHGFSSD
HmO2      561 SRNIAVMLLDIESTSLNE...RNQETGQTLLELSEBALAITSWTVEQIGDKFAHGFSSD
AcO2      563 GRDLAVLLLDIESTSLNE...TVAGTGO TVLQLSQBAV SMLAWAVDGDQFAHGFHSN
consensus>50 .R#i.!m.LLDI$S.n#.....tv1#1.q#A..l.a..in..GD.FA.I.GF.S#

```

▲▲▲

```

1 AfO1      635 GRHDVAYYRERDFDEAYSEEMGRIAGMTGKFSTRMGAAIRHAGHHLRHQRSRKLMLLVI
Tdo1      648 GRHDVEYRERDFDQHWNEVPKAKLAGMTGQLSTRMGAAIRHAGHHLRKQSAKRLMLLVI
Tco1      640 GRHDLQYTRERKQDFDPFDQDVHSLRAGMKGGLSTRMGAAIRHAGSYLEKQSSKRLMLLVI
HmO1      559 GRHDVQYTRERKQDFDPFNADVHAKMAGMTGGLSTRMGAAIRHAGAYLDRQTSKRLMLLVI
RsO1      606 GRHNVFYQRERDFGEDWGPMAARLARGMEGRSTRMGAAIRHAGWHLGGQRAAKRLMLLVL
2 AfO2      623 TRHEVRYQHHRKGFSEPEWGDVVKGRLAALQAGYSTRMGAAIRHAGHYLATRKADKRLMLLVL
Tdo2      633 TRHDVRYFHRKGYSERWDDVKARLAAMEAGYSTRMGAAIRHAGHYLSARPADKRLMLLIL
Tco2      621 TRHEVRYQHHRKGYSEHYGDEVKSRIAAAMEASYSTRMGAAIRHAGHYLEAQQAERKRLMLLIL
HmO2      618 TRHEVRYQHHRKGYSEGYTSDVKARIAAMEASYSTRMGAAIRHAGHYLSAQQAERKRLMLLIL
AcO2      620 TRHDLRFLEHRKGFSEAWDDTVKARLAGMCAARWSTRMGAAIRHAGHYLTHLARKTSRKLMLLIL
consensus>50 .RH#v.%...K.%#...d.v..r1A.$...STRMGaAmRHA.hyL..q...KL$1!

```

▲

```

1 AfO1      695 TDGEPADIDVRDPQYLRHDAARRAVEDLGRDGVITYCLSLDP...HADBYVSRIFGARNY
Tdo1      708 TDGEPADIDVRDPQYLRHDTKKAVEEVARNGVTTYCMCLSLDP...RADNYVSRIFGQKNY
Tco1      700 TDGEPADIDVRDPQYLRKQDAKKAVEELQAKGVYSYCLTIDQ...YADKYVHNIFGQNRV
HmO1      619 TDGEPADIDVRDPQYLRKQDAKKAVEELASRGGIYSYCLTIDQ...FADKYVQIFGARNRF
RsO1      666 TDGEPADIDVRDPQYLRHDAARAAYDEVTRQGVQSFCLTLD...QADSYVAQIFGERGY
2 AfO2      683 TDGEPADIDVRDPQYLRHDAARAAYDEVTRQGVQSFCLTLD...HADBYVADIFG.RQY
Tdo2      693 TDGEPADIDVRDPQYLRHDAARAAYDEVTRQGVQSFCLTLD...HADBYVADIFG.RQY
Tco2      681 TDGEPADIDVRDPQYLRHDAARAAYDEVTRQGVQSFCLTLD...NADBYVETIFG.NHY
HmO2      678 TDGEPADIDVRDPQYLRHDAARAAYDEVTRQGVQSFCLTLD...NADBYVETIFG.NQY
AcO2      670 TDGEPADIDVRDPQYLRHDAARAAYDEVTRQGVQSFCLTLD...QADSYVAQIFGERRF
consensus>50 TDG.PaD!D..D.q.L..Da..AVe#1..dG!y.%C..1Dp....AD.YV..IFg...%

```

▲

```

1 AfO1      751 QVIDHWERLPERLPILYAGLTR
Tdo1      764 MVVDHWQRLEKLPMLYAGLTR
Tco1      756 AIVDNVWLKLEKLPQLFANLTT
HmO1      675 AIVDNVMRLPERLPLTFANLTS
RsO1      722 QILDRIDRLPERLPLRLYAGLAR
2 AfO2      738 TVIDHIARLPERLPELFIALTR
Tdo2      752 TVIDRVERLPERLPELFMALT
Tco2      736 TVIDHWDLKLEKLPQVFMKITQ
HmO2      733 TVIDQVEKLEKLPQVFMKLT
AcO2      735 SVVDRIEHLPERLSEFIGLTR
consensus>50 .!iD.!e.LPE.Lp.1%.lt.

```

**Supplementary Figure 2| Sequence alignment of representative CbbO VWA domain sequences.** Amino acid sequences of CbbO1 and CbbO2 proteins from selected chemoautotrophic bacteria were aligned using Clustal Omega, and the C-terminal VWA domain is shown. Red lettering indicates similar residues, whereas identical residues are shown in white on red background. Regions of homology are framed in blue. A green background indicates a systematic difference between O1 and O2 sequences. MIDAS motif residues are indicated by triangles. Uniprot accession codes of the sequences are: *Acidithiobacillus ferrooxidans*, AfO1 (B7JA27), AfO2 (B7J5E5); *Thiobacillus denitrificans*, TdO1 (Q3SFN2), TdO2 (Q3SFL7); *Thiomicrospira crunogena* XCL-2, TcO1 (Q31IJ7), TcO2 (Q31IK5); *Hydrogenovibrio marinus*, HmO1 (Q75W42), HmO2 (Q75W24); *Rhodobacter sphaeroides* ATCC17025, RsO1 (A4WZV4); *Acidithiobacillus caldus*, AcO2 (F9ZR07).

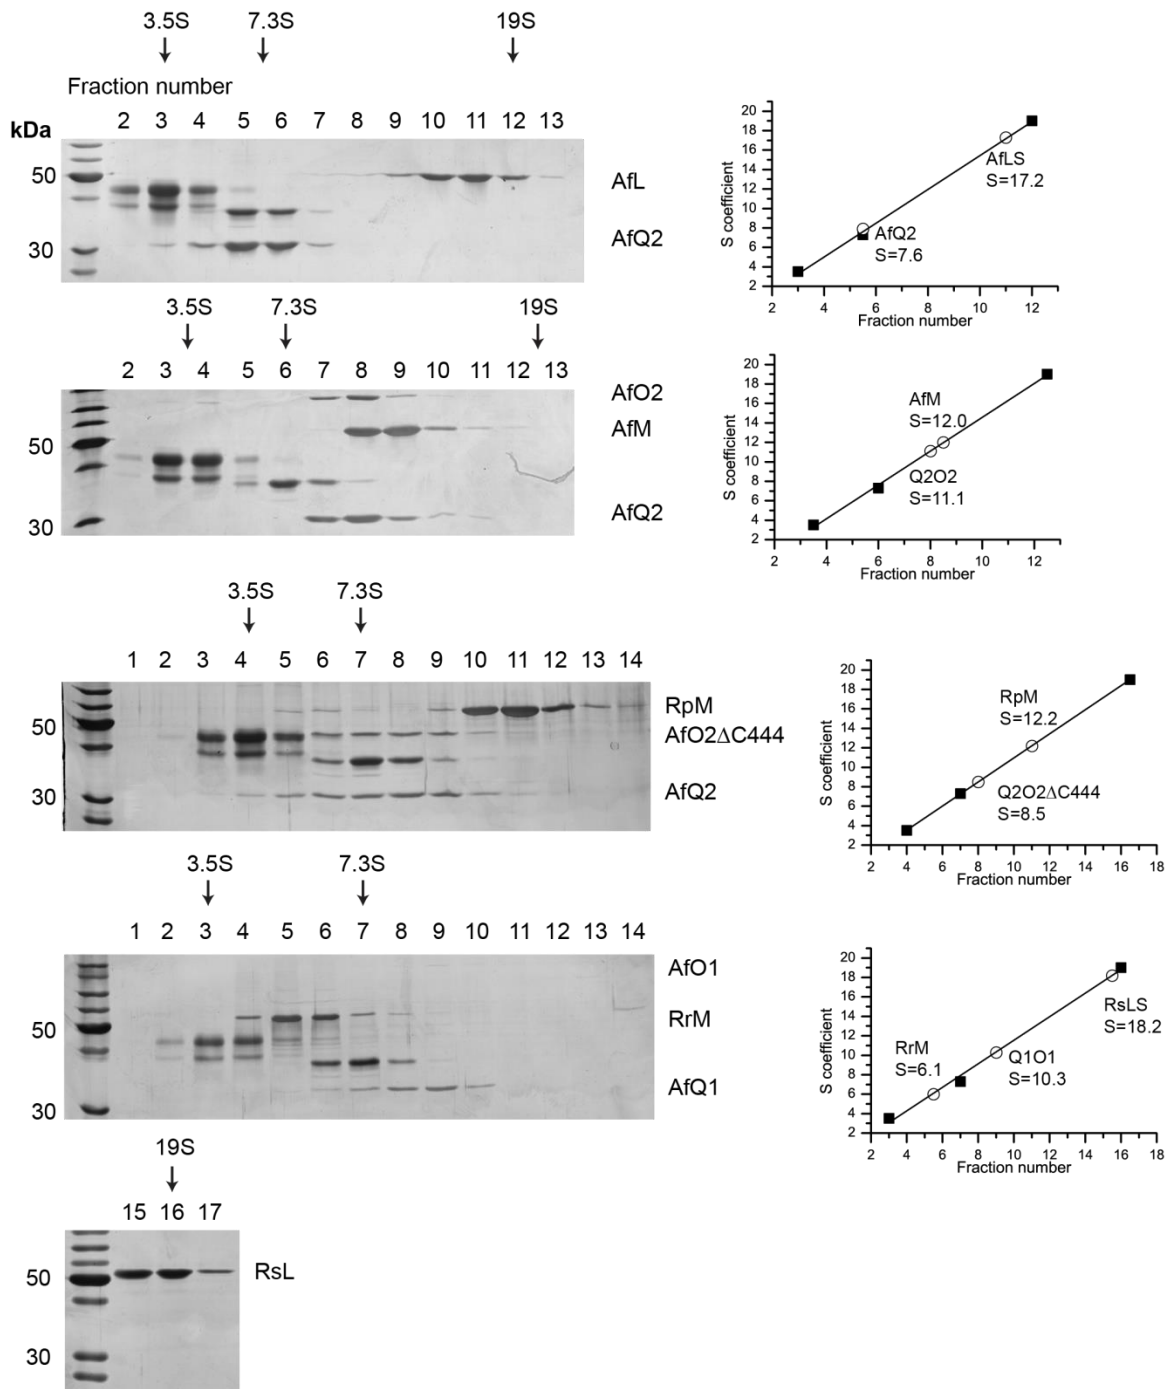

**Supplementary Figure 3| Glycerol gradient sedimentation analysis of rubisco and activase proteins.** Purified protein complexes were separated using a 10 ml 5-30% glycerol gradient and 500  $\mu$ l fractions were analyzed using SDS-PAGE followed by silver-staining. Standard proteins used (black squares) were aldolase (7.3S), ovalbumin (3.5S) and thyroglobulin (19S).

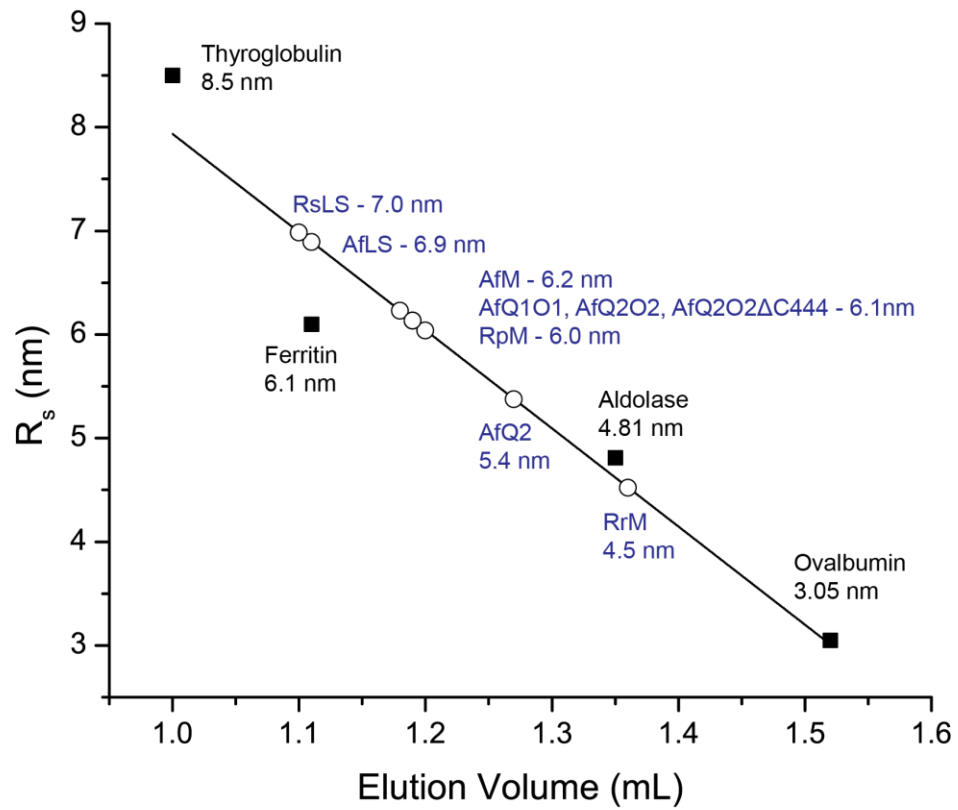

**Supplementary Figure 4| Determination of the Stokes radius ( $R_s$ ).** Elution volumes were obtained from the data presented in Figs. 1c and 2a.

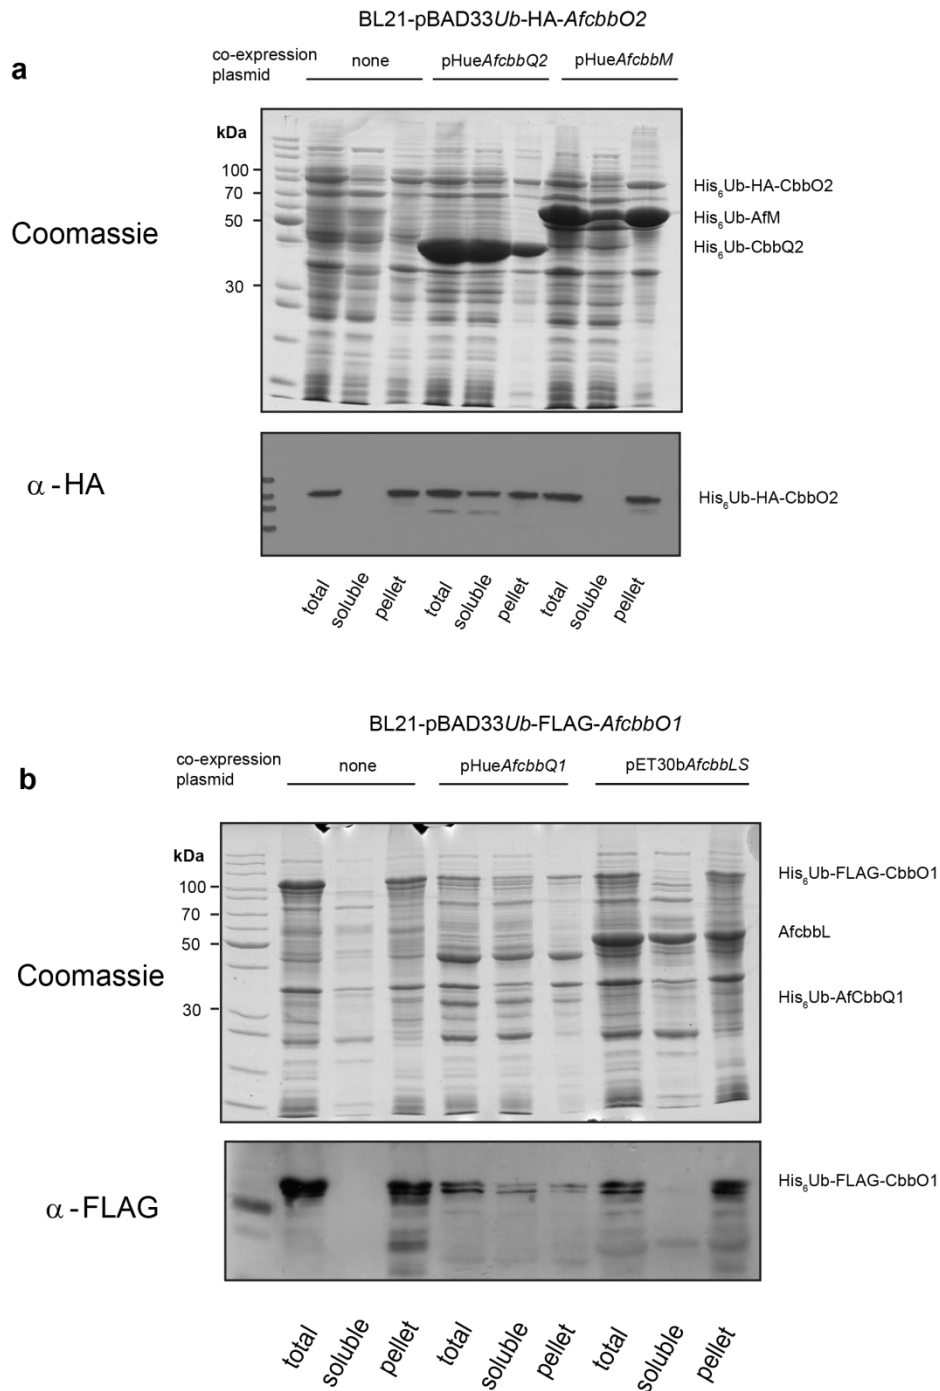

**Supplementary Figure 5| Co-expression of CbbQ leads to CbbO solubility in *E. coli*.**

SDS-PAGE analysis of total, soluble and pellet fractions of cell lysates expressing HA-tagged CbbO2 (a) and FLAG-tagged CbbO1 (b) proteins as His<sub>6</sub>-Ubiquitin fusion proteins in the presence or absence of plasmids encoding relevant CbbQ and Rubisco proteins. Gels were analyzed by Coomassie staining (upper panels) and immunoblotting against the HA or FLAG epitope (lower panels).

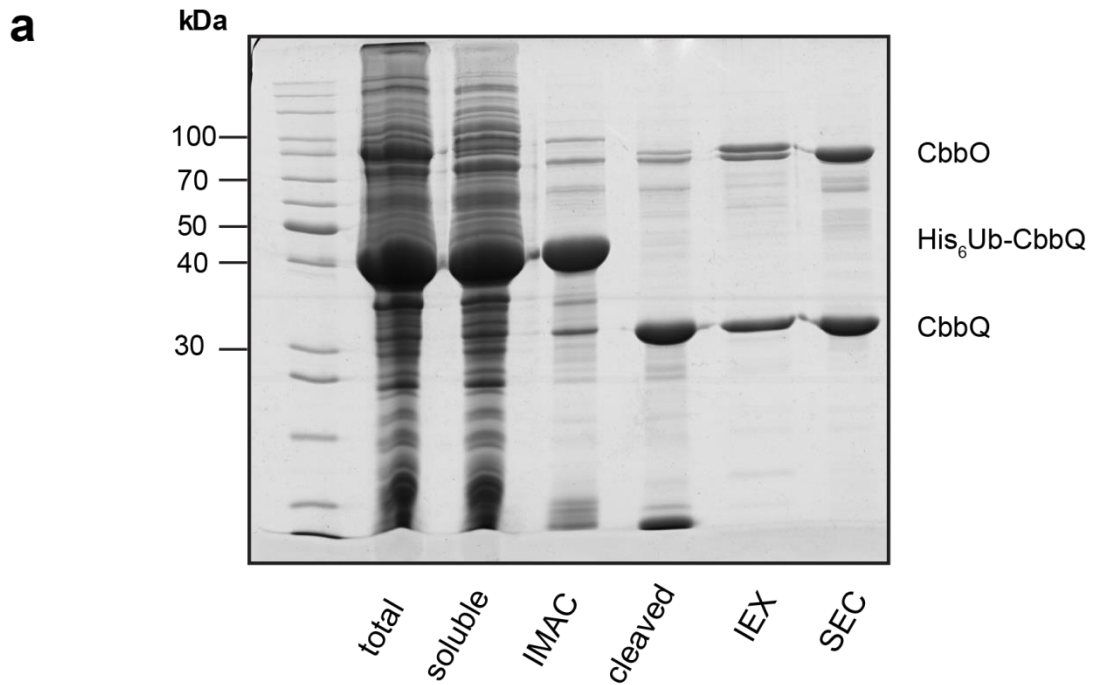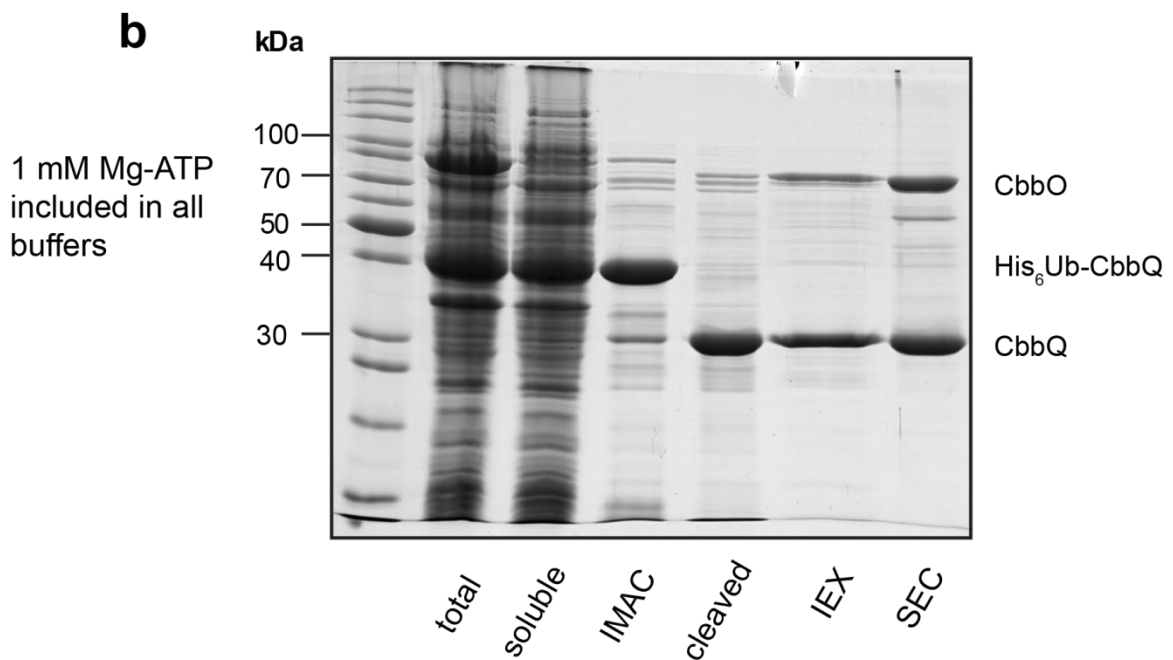

**Supplementary Figure 6| Purification of Q2O2.** SDS-PAGE analysis of the stages of a representative Q2O2 purification in the absence (a) and presence (b) of 1 mM Mg-ATP in all buffers. IMAC, eluted fraction after immobilized metal affinity chromatography; cleaved, IMAC fraction after cleavage of the His<sub>6</sub>-Ub moiety; IEX, ion exchange chromatography; SEC, size exclusion chromatography.

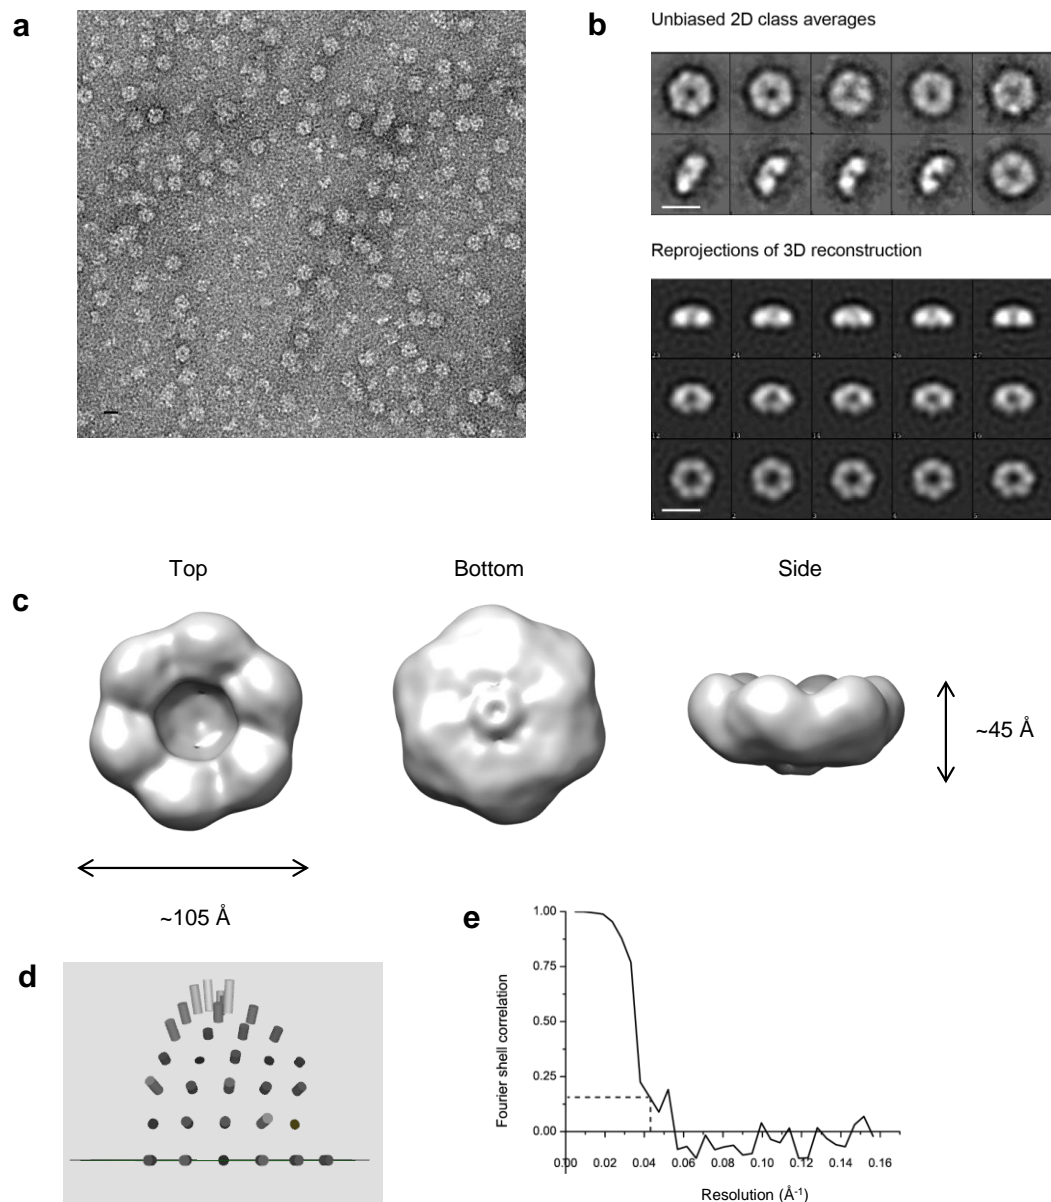

**Supplementary Figure 7 | Negative-stain electron microscopy of AfQ2.** **a**, A raw electron micrograph of AfQ2 (50  $\mu\text{g/ml}$ ) in the presence of 5 mM Mg-ATP. Scale bar, 100  $\text{\AA}$ . **b**, Comparison of unbiased 2D class averages with re-projections of the 3D-EM reconstruction. **c**, 3D-EM reconstruction of AfQ2 with an imposed six-fold symmetry. The contour level shown is 2.93 corresponding to a volume of 292,000  $\text{\AA}^3$ . Images were generated using Chimera<sup>2</sup>. **d**, Euler angle distribution of the dataset with six-fold symmetry imposed. The height of the cylinders represents the number of particles present in each orientation (image generated with EMAN2<sup>3</sup>). **e**, Fourier shell correlation curve. The final resolution was estimated at 23  $\text{\AA}$  resolution using a 0.143 cut-off criterion.

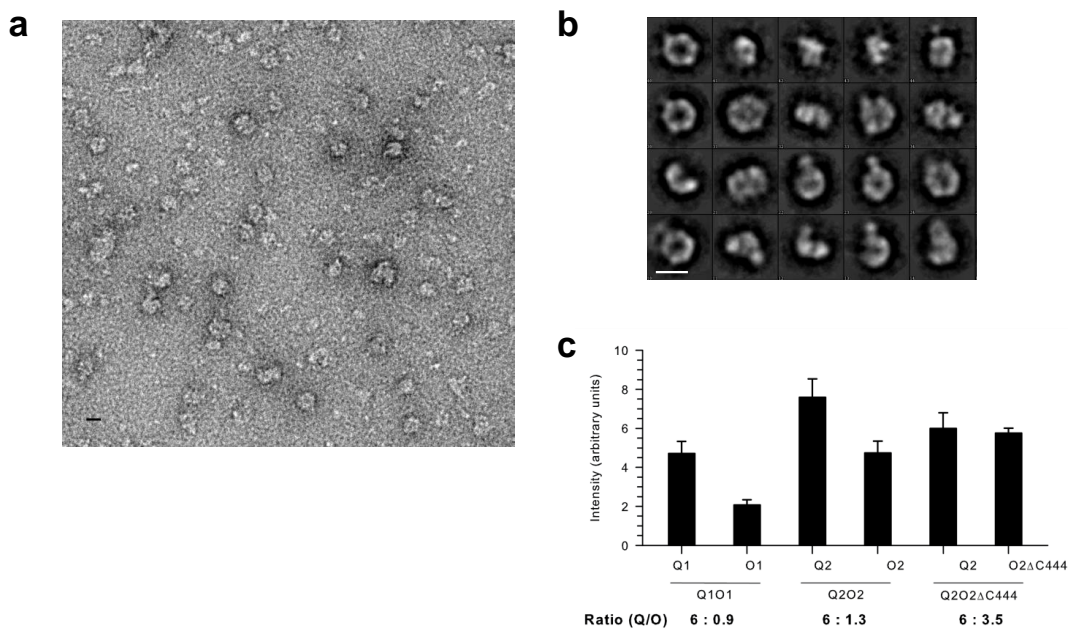

**Supplementary Figure 8 | EM analysis of Q2O2 $\Delta$ C444 and quantitative densitometry of the CbbQO complexes.** **a**, A raw electron micrograph of Q2O2 $\Delta$ C444 (80  $\mu$ g/ml) in the presence of 5 mM Mg-ATP. **b**, Representative unbiased 2D class averages derived from 12486 particles. Scale bars, 100  $\text{\AA}$ . **c**, Densitometry of Q1O1, Q2O2 and Q2O2 $\Delta$ C444. 0.6, 0.8 and 1.0  $\mu$ g of protein were analyzed by SDS-PAGE and Coomassie-Blue stained bands were quantified using LabQuant. Calculated ratios of CbbQ to CbbO subunits are indicated.



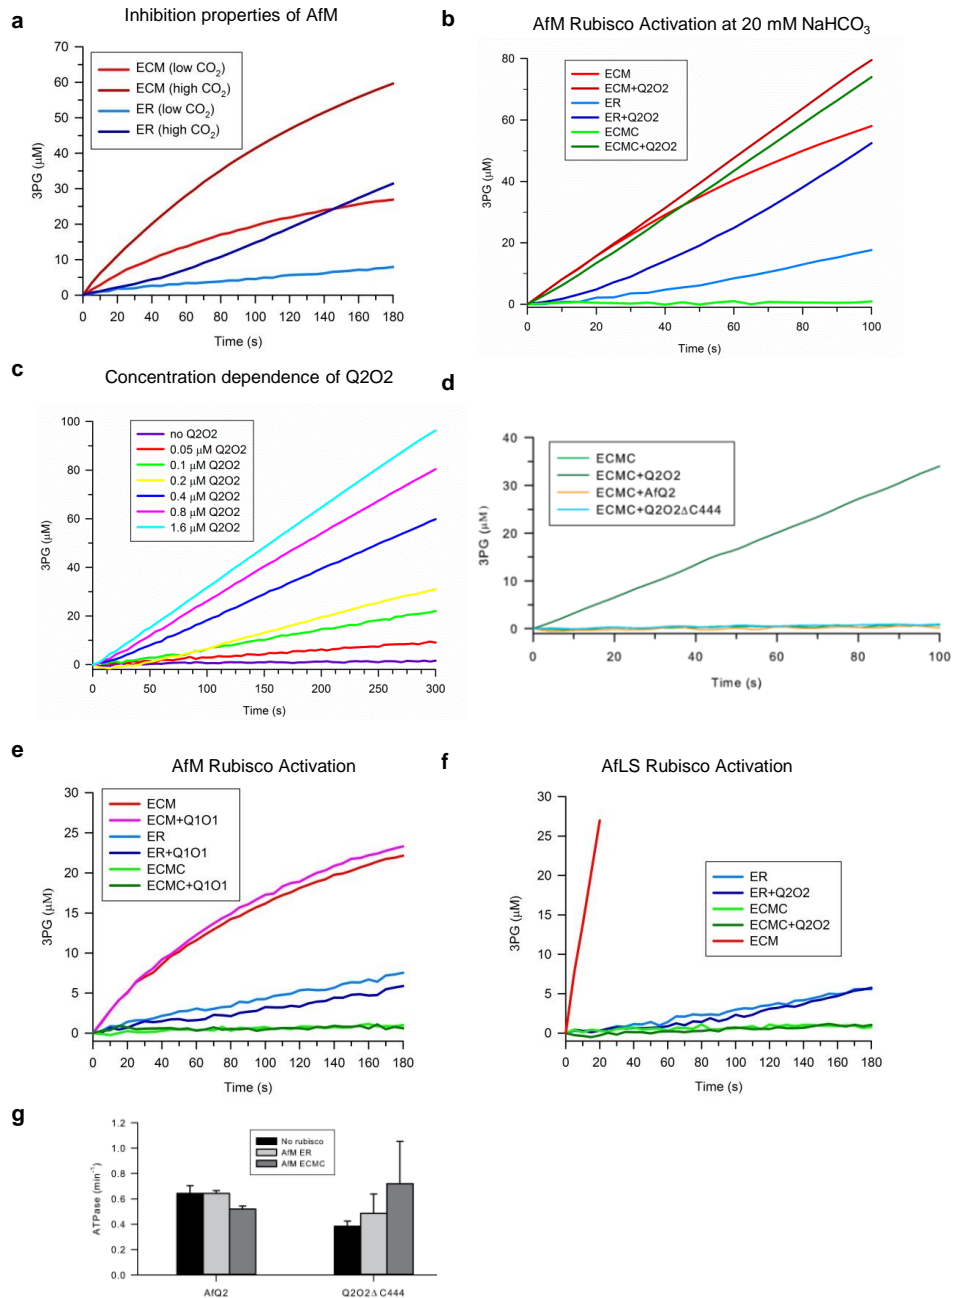

**Supplementary Figure 9 | Properties of the CbbQO activation systems. a**, Inhibition properties of form II rubisco (AfM). Rubisco activity measurements of AfM complexes (0.1 μM active sites) were performed at 5 mM NaHCO<sub>3</sub> (low CO<sub>2</sub>) and 20 mM NaHCO<sub>3</sub> (high CO<sub>2</sub>). **b**, Q2O2 also functions at high CO<sub>2</sub> (20 mM NaHCO<sub>3</sub>) **c**, Activation assays of AfM ECMC were performed at 5 mM NaHCO<sub>3</sub> using varying concentrations of Q2O2. **d**, AfQ2 and Q2O2ΔC444 cannot activate AfM. **e**, Form II rubisco (AfM) cannot be activated by Q1O1. **f**, Form I rubisco (AfLS) cannot be activated by Q2O2. Experimental conditions for (b)-(f) are as described for Fig. 3 b-e unless indicated otherwise. **g**, The ATPase activity of AfQ2 and Q2O2ΔC444 is not stimulated by inhibited rubisco. CbbQ protomer concentrations used were 6.6 μM (AfQ2) and 5.2 μM (Q2O2ΔC444). 3 μM of AfM active sites were used. Error bars indicate the mean and S.D. of at least three independent experiments.

**a**

|      |               |      |                  |        |          |
|------|---------------|------|------------------|--------|----------|
| CbbX | 73-GNPGTGKT-  | 28 - | LVGQYIGHT        | - 16 - | FIDEAYYL |
| ClpX | 118-GPTGSGKT- | 22 - | TEAGYVGED        | - 24 - | YIDEIDKI |
| AfQ1 | 39-GPTGCGKT-  | 23 - | TASDLVGRF        | - 24 - | YLDEVVEA |
| AfQ2 | 43-GPTGCGKS-  | 23 - | <u>TAADLVGRW</u> | - 24 - | YLDEIVEA |

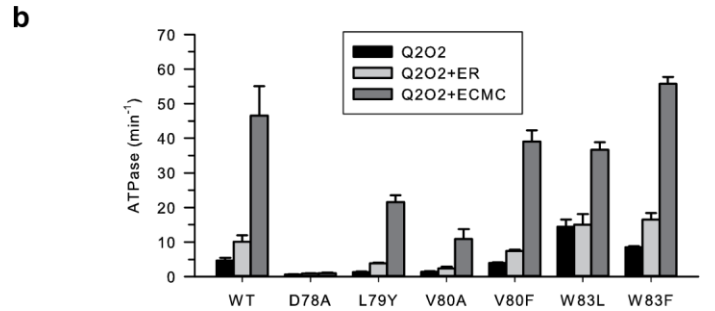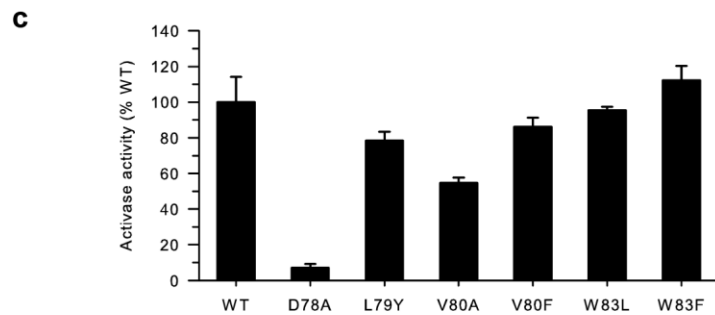

**Supplementary Figure 10| The role of pore loop 1 in Q2O2 function.** **a**, Partial sequence alignments of *Rhodobacter sphaeroides* CbbX, *Escherichia coli* ClpX, AfQ1 and AfQ2 to predict pore loop 1, which is located between the Walker A and Walker B motifs. Residues mutated in this analysis are underlined. **b**, ATPase activity of wild-type and mutant Q2O2 proteins (0.27  $\mu$ M oligomer) in the absence and presence of AfM complexes (3  $\mu$ M active sites). **c**, Relative rubisco activase activity of wild-type and mutant Q2O2 complexes. Experimental conditions for (b) and (c) are the same as described for Fig. 5. Error bars indicate the mean and S.D. of at least three independent experiments.

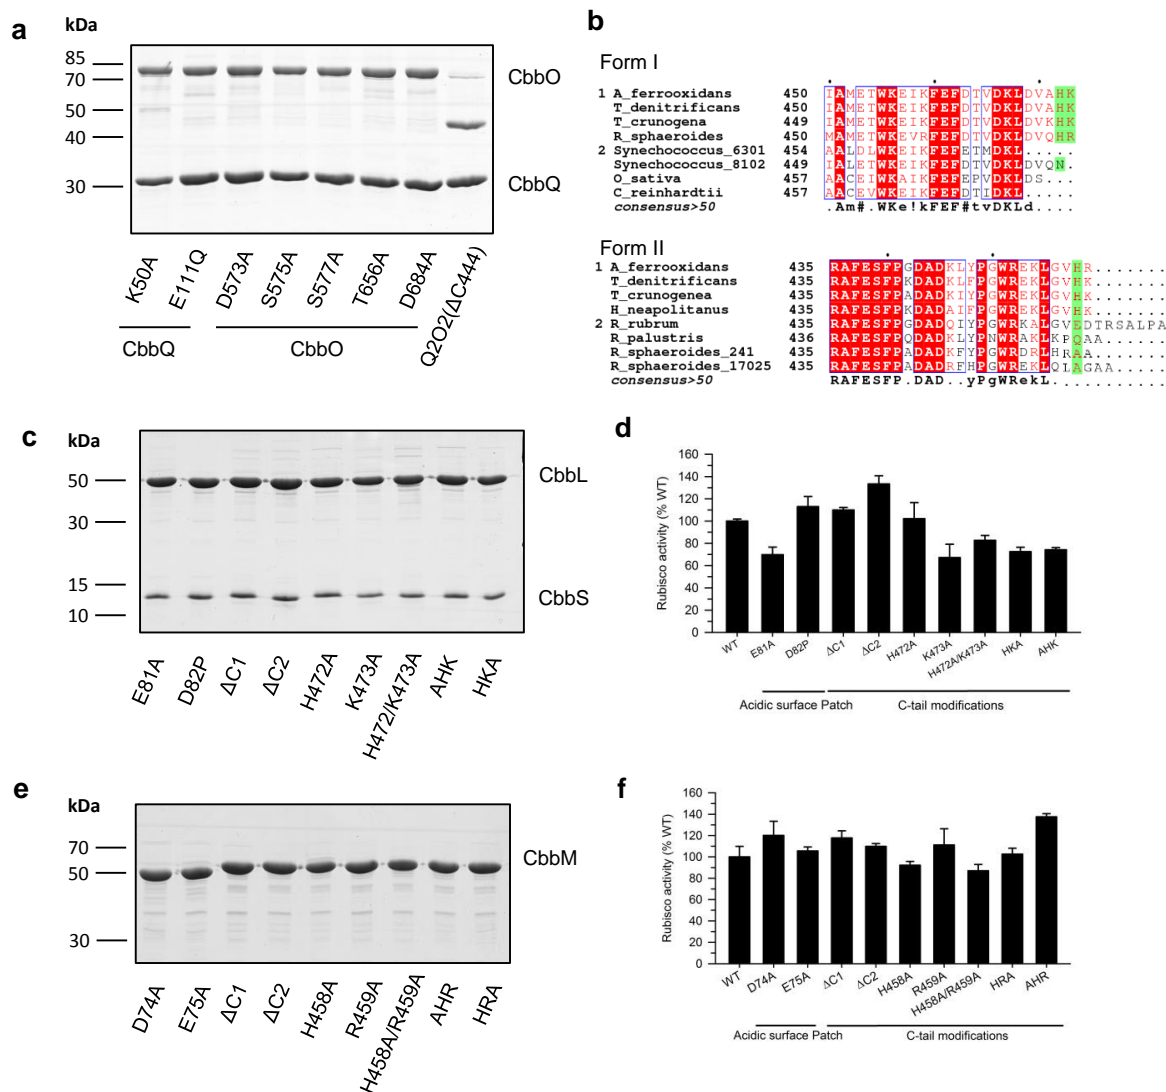

**Supplementary Figure 11| Properties of purified Q2O2, AfLS and AfM mutant proteins. a,c,e** SDS-PAGE analysis of Q2O2 (a), AfLS (c) and AfM (e) mutants. 5  $\mu$ g (a) and 3  $\mu$ g (c, e) were loaded per lane. **b**, Sequence alignment of the C-termini of selected form I and form II rubisco large subunits. Group 1 sequences are encoded in *cbbQ-cbbO* containing operons. **d, f** Relative rubisco activities of the fully activated ECM forms of AfLS (d) and AfM (f) mutants. Error bars indicate the mean and S.D. of at least three independent experiments.

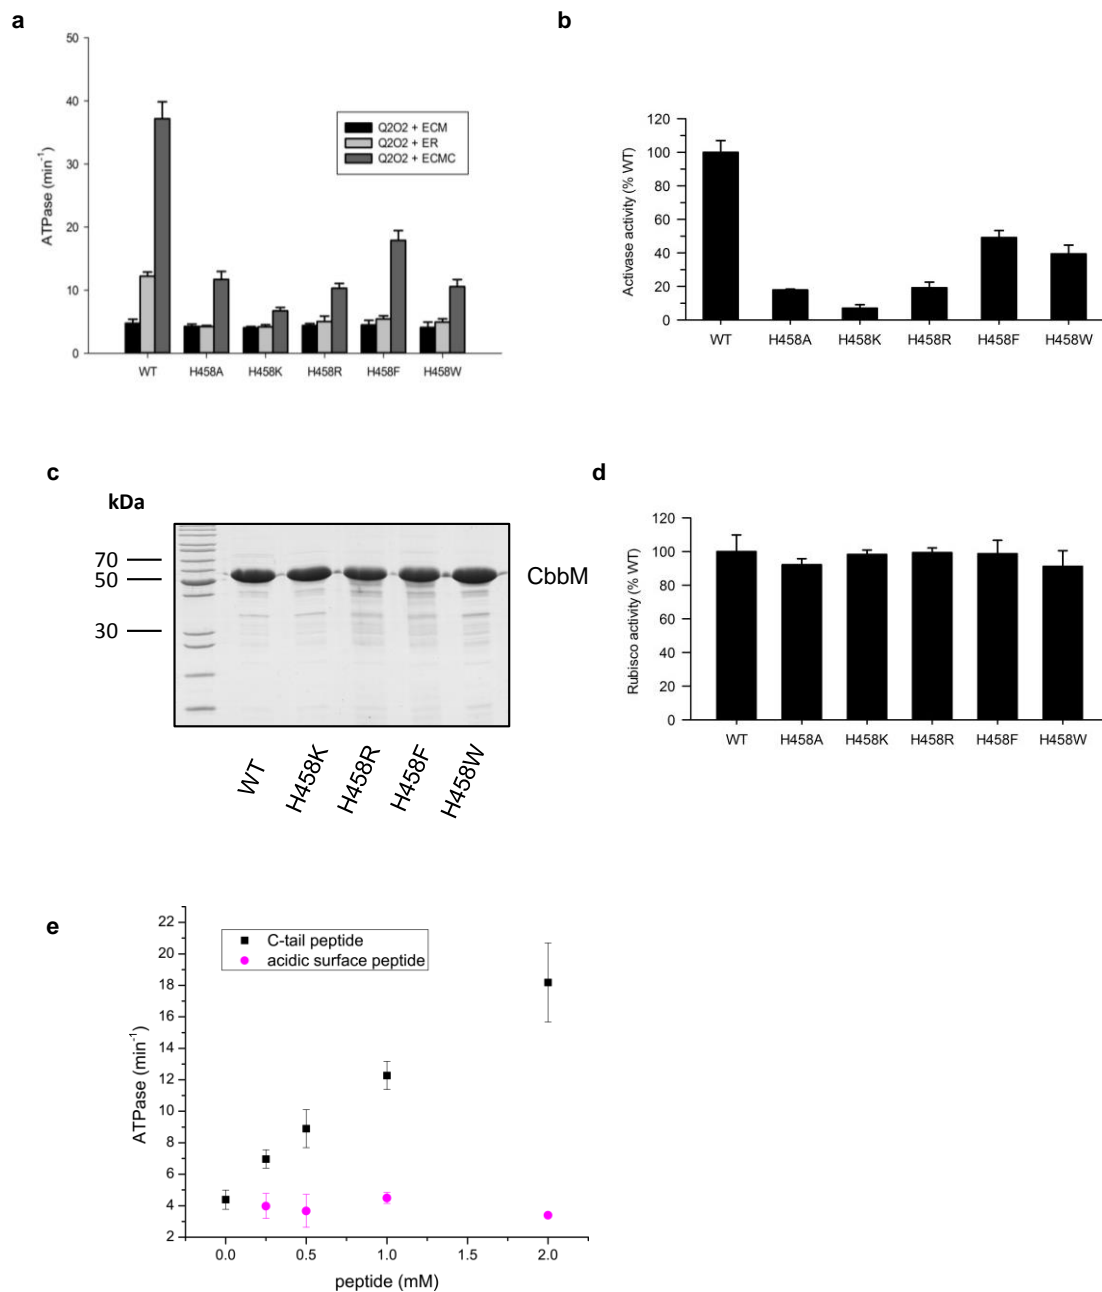

**Supplementary Figure 12| The role of the large subunit C-terminus.** **a**, ATPase activity assays of wild-type Q2O2 (0.27  $\mu$ M oligomer) in the presence of the indicated AfM complexes (3  $\mu$ M active sites). **b**, Relative rubisco activase activity of Q2O2 using mutant AfM ECMC complexes as substrate. Experimental conditions for (a) and (b) are as in Fig. 5. **c**, SDS-PAGE analysis of the AfM mutants (3  $\mu$ g protein/lane). **d**, Relative rubisco activities of the fully activated ECM forms of AfM mutants. **e**, A peptide corresponding to the large subunit C-terminus stimulates Q2O2 ATPase activity. The ATPase activity of Q2O2 (0.27  $\mu$ M oligomer) was measured in the presence of varying concentrations of a C-tail peptide (PGWREKLGVHR) and a peptide including the identified interacting acidic surface residue of AfM (VYHIDEATEDM). Error bars indicate the mean and S.D. of at least three independent experiments.

**Supplementary Table 1| Plasmids used in this study.**

| <b>Name</b>                  | <b>Relevant information</b>                 | <b>Source or reference</b> |
|------------------------------|---------------------------------------------|----------------------------|
| <i>pHueAfcbbQ1</i>           | amp <sup>r</sup> , T7 promoter              | This study                 |
| <i>pHueAfcbbQ2</i>           | amp <sup>r</sup> , T7 promoter              | This study                 |
| <i>pET30bAfcbbLS</i>         | km <sup>r</sup> , T7 promoter               | This study                 |
| <i>pHueAfcbbM</i>            | amp <sup>r</sup> , T7 promoter              | This study                 |
| <i>pBAD33UbAfcbbO1</i>       | cm <sup>r</sup> , P <sub>BAD</sub> promoter | This study                 |
| <i>pBAD33UbAfcbbO2</i>       | cm <sup>r</sup> , P <sub>BAD</sub> promoter | This study                 |
| <i>pBAD33Ub-FLAG-AfcbbO1</i> | cm <sup>r</sup> , P <sub>BAD</sub> promoter | This study                 |
| <i>pBAD33Ub-HA-AfcbbO2</i>   | cm <sup>r</sup> , P <sub>BAD</sub> promoter | This study                 |
| <i>pTrcrbcM</i>              | amp <sup>r</sup> , trc promoter             | <sup>4</sup>               |
| <i>pHueRrcbbM</i>            | amp <sup>r</sup> , T7 promoter              | This study                 |
| <i>pHueRpcbM</i>             | amp <sup>r</sup> , T7 promoter              | This study                 |
| <i>pET30bRscbbLS</i>         | km <sup>r</sup> , T7 promoter               | <sup>5</sup>               |

Only plasmids containing the wild-type genes are listed for simplicity.

## Supplementary Table 2| Primers used in this study.

Primers used to generate *E. coli* expression plasmids.

| Name            | Sequence (5'→3')                                                                  |
|-----------------|-----------------------------------------------------------------------------------|
| 5SacIIAFCbbQ1   | CTCCGCGGTGGTATGAACGACCAGTTGACTGAA                                                 |
| 3HindIIIAfCbbQ1 | TTAAGCTTTAGAAGTACGTGGTGACTGCGGC                                                   |
| 5SacIIAFCbbO1   | CTCCGCGGTGGTATGAAACATCTCGAAGAT                                                    |
| 3HindIIIAfCbbO1 | GTAAGCTTTATCGGGTCAGCCAGCGTATAAT                                                   |
| 5NdeIAfL1       | AACATATGGCCGTCAAGACCTATAACGC                                                      |
| 3HindIIIAfS1    | ATAAGCTTTATACGGTCTTGCCCCGATAGACT                                                  |
| 5SacIIAFCbbQ2   | CTCCGCGGTGGTATGACTGCAACAGATTCCT                                                   |
| 3HindIIIAfCbbQ2 | ATAAGCTTTAGGCGAAGGTCATGTCTGA                                                      |
| 5SacIIAfM       | CTCCGCGGTGGTATGGATCAATCTAATCGCTATG                                                |
| 3HindIIIAfM     | ATAAGCTTTACCGGTGTACGCCAGCTTTTCGCGCCAGCCCCGGGTAG                                   |
| 5SacIIAFCbbO2   | CTCCGCGGTGGTATGACGGATCATCCGCGC                                                    |
| 3HindIIIAfCbbO2 | ATAAGCTTTACCGGGTCAGGGCGATGAA                                                      |
| pHueFlag_for    | CTGGTGTTCGCGCTCCGGGGTGAATGGATTACAAAGACGATGACGA<br>TAAAGCGGGCCGCGGTGGATCCGAATTCGA  |
| pHueFlag_rev    | TCGAATTCGGATCCACCGCGGCCCGCTTTATCGTCATCGTCTTTGTAA<br>TCCATTCCACCCCGGAGGCGCAACACCAG |
| pHueHA_for      | CCTCCGGGGTGAATGTATCCATATGATGTTCCAGATTATGCTGCGG<br>GCCGCGGTGGAT                    |
| pHueHA_rev      | ATCCACCGCGGCCCGCAGCATAATCTGGAACATCATATGGATACATT<br>CCACCCCGGAGG                   |
| 5BamHIRrRbcM    | CTGGATCCATGGACCAGTCATCTCGTTACGTCAATCTG                                            |
| 3HindIIIRrRbcM  | TGAAGCTTTACGCCGGAAGGGCGCTGC                                                       |

Primers used to generate mutations in *cbbQ2*

|               |                               |
|---------------|-------------------------------|
| AfQ2K50A_for  | AGCGGTTGCGGCGCGTCCCGCTTTG     |
| AfQ2K50A_rev  | CAAAGCGGGACGCGCCGCAACCGCT     |
| AfQ2E111Q_for | AGCTATCTGGACCAAATTGTCTGAGG    |
| AfQ2E111Q_rev | CCTCGACAATTTGGTCCAGATAGCT     |
| AfQ2D78A_for  | ATGACCGCCGCAGCTCTAGTCGGCCGC   |
| AfQ2D78A_rev  | GCGGCCGACTAGAGCTGCGGCGGTTCAT  |
| AfQ2L79Y_for  | ACCGCCGCGGATTATGTCTGCGCCGCTGG |
| AfQ2L79Y_rev  | CCAGCGGCCGACATAATCGGCGGCGGT   |
| AfQ2V80A_for  | CGCCGATCTGGCAGGCCGCTGGCT      |
| AfQ2V80A_rev  | AGCCAGCGGCCTGCCAGATCGGCG      |
| AfQ2V80F_for  | GCCGCCGATCTGTTTGGCCGCTGGCTG   |
| AfQ2V80F_rev  | CAGCCAGCGGCCAAACAGATCGGCGGC   |
| AfQ2W83F_for  | CTGGTCGGCCGCTTTCTGCTCGACAA    |
| AfQ2W83F_rev  | TTGTCTGAGCAGAAAGCGGCCGACCAG   |
| AfQ2W83L_for  | CTGGTCGGCCGCTTGCTGCTCGACAA    |
| AfQ2W83L_rev  | TTGTCTGAGCAGCAAGCGGCCGACCAG   |

Primers used to generate mutations in *cbbO2*

|               |                             |
|---------------|-----------------------------|
| AfO2D573A_for | CTCCCTGCTGCTGGCCTTGTCGAATC  |
| AfO2D573A_rev | GATTCGGACAAGGCCAGCAGCAGGGAG |
| AfO2S575A_for | CTTGCTGGACTTGGCCGAATCACTG   |
| AfO2S575A_rev | CAGTGATTCGGCCAAGTCCAGCAAG   |

|                          |                            |
|--------------------------|----------------------------|
| AfO2S577A_for            | CTACTTGTCCGAAGCACTGAACGAA  |
| AfO2S577A_rev            | TTCGTTTCAGTGCTTCGGACAAGTAG |
| AfO2T656A_for            | AAGCCGGTACTCGGCCCGGATGGGC  |
| AfO2T656A_rev            | GCCCATCCGGGCCGAGTAACCGGCTT |
| AfO2D684A_for            | AATGGTACTCACCGCCGGCCGGCCC  |
| AfO2D684A_rev            | GGGCCGGCCGGCGGTGAGTACCATT  |
| AfO2( $\Delta$ C444)_for | AGGAAGAGGCCTAAGACGCAGAACAG |
| AfO2( $\Delta$ C444)_rev | CTGTTCTGCGTCTTAGGCCTCTTCCT |

---

Primers used to generate mutations in *Afcbbl*

---

|                    |                                |
|--------------------|--------------------------------|
| AfLE81A_for        | GCATACAGGATTGCAGACGTTCCGGGCGAT |
| AfLE81A_rev        | ATCGCCCGGAACGTCTGCAATCCTGTATGC |
| AfLD82P_for        | CAGGATTGAACCCGTTCCGGGCG        |
| AfLD82P_rev        | CGCCCGGAACGGGTTCAATCCTG        |
| Af $\Delta$ C1_for | GACGTTGCCCATTAATAAGCACGT       |
| Af $\Delta$ C1_rev | ACGTGCTTATTAATGGGCAACGTC       |
| Af $\Delta$ C2_for | TGGACGTTGCCTAAAAATAAGCACG      |
| Af $\Delta$ C2_rev | CGTGCTTATTTTTAGGCAACGTCCA      |
| AfLH472A_for       | CTGGACGTTGCCGCTAAATAAGCACGT    |
| AfLH472A_rev       | ACGTGCTTATTTAGCGGCAACGTCCAG    |
| AfLK473A_for       | ACGTTGCCCATGCATAAGCACGTTT      |
| AfLK473A_rev       | AAACGTGCTTATGCATGGGCAACGT      |
| AfLH472A/K473A_for | CTGGACGTTGCCGCTGCATAAGCACGTTTA |
| AfLH472A/K473A_rev | TAAACGTGCTTATGCAGCGGCAACGTCCAG |
| AfLHKA_for         | GTTGCCCATAAAGCATAAGCACGTTTAT   |
| AfLHKA_rev         | ATAAACGTGCTTATGCTTTATGGGCAAC   |
| AfLAHK_for         | CTGGACGTTGCCGCTCATAAATAAGCA    |
| AfLAHK_rev         | TGCTTATTTATGAGCGGCAACGTCCAG    |

---

Primers used to generate mutations in *Afcbm*

---

|                    |                                |
|--------------------|--------------------------------|
| AfMD74A_for        | TCTATCATATCGCCGAAGCCACCGA      |
| AfMD74A_rev        | TGGGTGGCTTCGGCGATATGATAGA      |
| AfME75A_for        | ATCATATCGACGCAGCCACCGAGGA      |
| AfME75A_rev        | TCCTCGGTGGCTGCGTCGATATGAT      |
| Af $\Delta$ C1_for | TGGGCGTACACTAATAAAGCTTAGA      |
| Af $\Delta$ C1_rev | TCTAAGCTTTATTAGTGTACGCCCA      |
| Af $\Delta$ C2_for | AGCTGGGCGTATAACGGTAAAGCTTA     |
| Af $\Delta$ C2_rev | TAAGCTTTACCGTTATACGCCCAGCT     |
| 3HindIIIAfMH458A   | TTAAGCTTCACCGGGCTACGCCCAGCTTT  |
| AfLR459A_for       | TGGGCGTACACGCGTAAAGCTTAGAT     |
| AfLR459A_rev       | ATCTAAGCTTTACGCGTGTACGCCCA     |
| AfLH458A/R459A_for | AGCTGGGCGTAGCCGCGTAAAGCTTAG    |
| AfLH458A/R459A_rev | CTAAGCTTTACGCGGCTACGCCCAGCT    |
| AfMHRA_for         | GGCGTACACCGGGCATAAAGCTTAGAT    |
| AfMHRA_rev         | ATCTAAGCTTTATGCCCGGTGTACGCC    |
| 3HindIIIAfMAHR     | TTAAGCTTTACCGGTGTGCTACGCCCAGCT |

AfMH458K\_for  
AfMH458K\_rev  
AfMH458R\_for  
AfMH458R\_rev  
AfMH458F\_for  
AfMH458F\_rev  
AfMH458W\_for  
AfMH458W\_rev

AAGCTGGGCGTAAAACGGTAAAGCTTA  
TAAGCTTTACCGTTTTACGCCCAGCTT  
AAGCTGGGCGTACGCCGGTAAAGCTTA  
TAAGCTTTACCGGCGTACGCCCAGCTT  
AAGCTGGGCGTATTTTCGGTAAAGCTTA  
TAAGCTTTACCGAAATACGCCCAGCTT  
AAGCTGGGCGTATGGCGGTAAAGCTTA  
TAAGCTTTACCGCCATACGCCCAGCTT



## Supplementary References

- 1 Gouet, P., Courcelle, E., Stuart, D. I. & Metoz, F. ESPript: analysis of multiple sequence alignments in PostScript. *Bioinformatics* **15**, 305-308 (1999).
- 2 Pettersen, E. F. *et al.* UCSF Chimera--a visualization system for exploratory research and analysis. *J Comput Chem* **25**, 1605-1612 (2004).
- 3 Tang, G. *et al.* EMAN2: an extensible image processing suite for electron microscopy. *J. Struct. Biol.* **157**, 38-46 (2007).
- 4 Mueller-Cajar, O., Morell, M. & Whitney, S. M. Directed Evolution of Rubisco in *Escherichia coli* Reveals a Specificity-Determining Hydrogen Bond in the Form II Enzyme. *Biochemistry* **46**, 14067-14074 (2007).
- 5 Mueller-Cajar, O. *et al.* Structure and function of the AAA+ protein CbbX, a red-type Rubisco activase. *Nature* **479**, 194-199 (2011).
